# Supplementary material for: Low Intensity Ultrasound Neuromodulation for the treatment of Major Depressive Disorder: Systematic Review and Meta‑Analysis of Randomized Controlled Trials
Source: Research Square preprint supplement (doi:10.21203/rs.3.rs-7930997/v1), 2025-11-24

**Supplementary Materials**

1. **Search strategy and databases hit**

| **Database** | **Hits** |
| --- | --- |
| **PubMed** | **N = 74** |
| **Embase** | **N = 784** |
| **Cochrane Central Register of Controlled Trials** | **N = 40** |
| **PsychINFO** | **N = 40** |
| **Clinical trials.gov** | **N = 8** |
| **Web Of Science** | **N= 99** |
| **Scopus** | **N= 18** |
| **Total** | **N = 1023** |
| **Duplicates** | **N= 239** |
| **Unique studies to screen** | **N= 784** |

1. Leave one out analysis


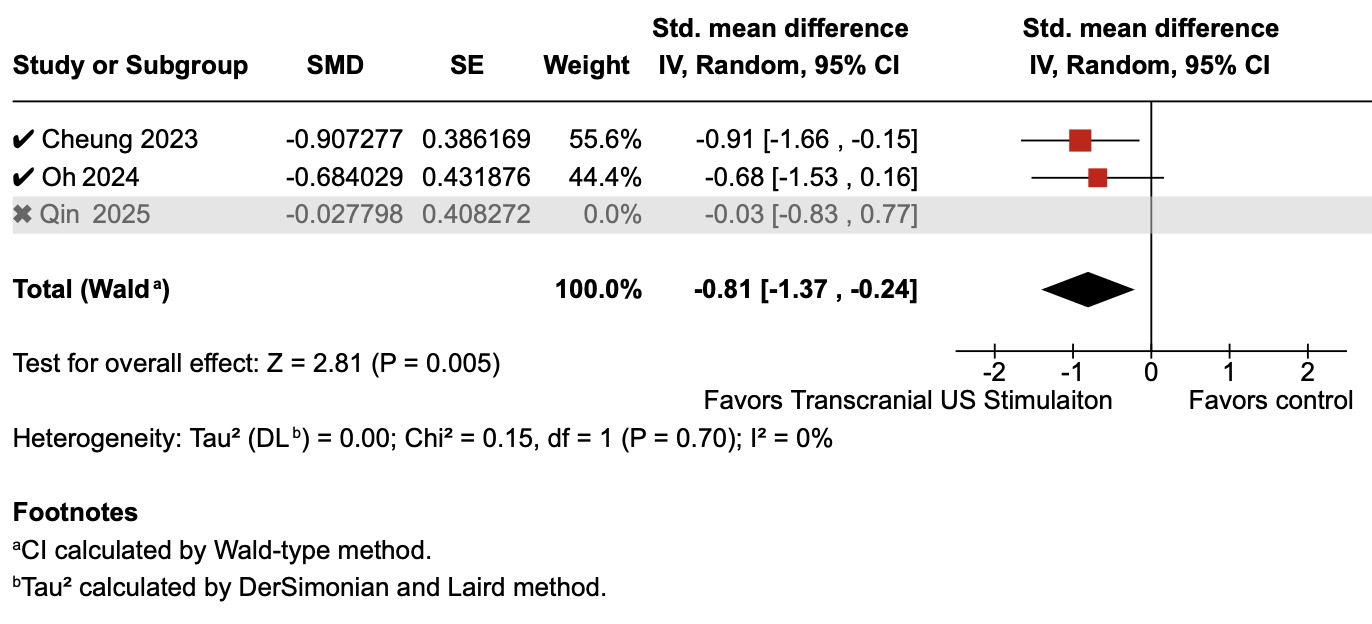

Supplement: Supplementary file 1 [file 34fd9bbf404e2a3979204c17.docx]
